# Supplementary material for: Arctigenin inhibits STAT3 and exhibits anticancer potential in human triple-negative breast cancer therapy
Source: PubMed Central journal article supplement (PMC5352123; doi:10.18632/oncotarget.13393), 2016-11-16
Supplement: oncotarget-08-329-s001.pdf [file oncotarget-08-329-s001.pdf]

# Arctigenin inhibits STAT3 and exhibits anticancer potential in human triple-negative breast cancer therapy

## Supplementary Materials

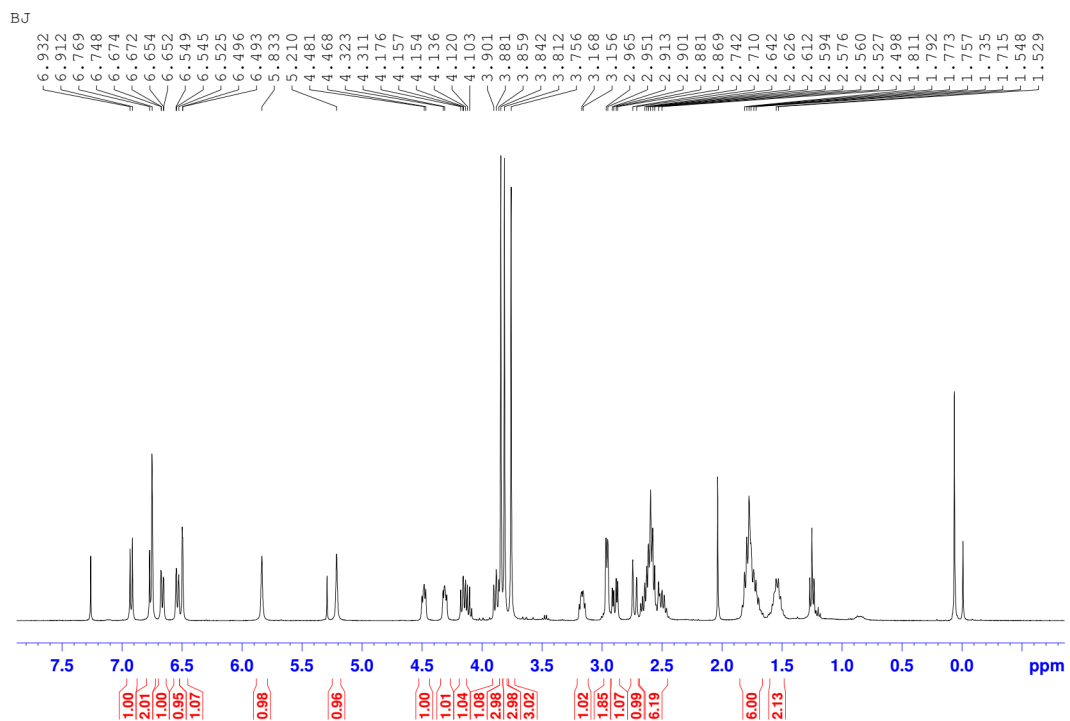

Supplementary Figure S1: Nuclear magnetic resonance analysis of Biotin-Atn.
